# Supplementary material
Source: publisher figshare collection journal article supplement (https://aacr.figshare.com/articles/dataset/_/22473167)
Supplement: Supplementary file 1 [file 39924659]

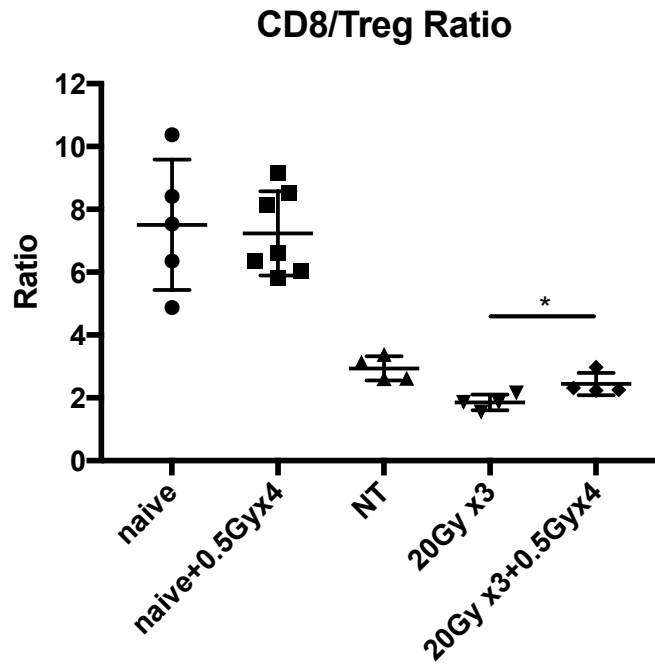

**Supplementary Figure4. Increased CD8/Treg ratio in whole lung**

Whole lung phenotyping by flow cytometry 19 days after primary tumor ablation

\*  $p < 0.05$  by ANOVA multiple comparison
